# Supplementary material for: An Immune Atlas of Clear Cell Renal Cell Carcinoma
Source: PubMed Central journal article supplement — Cell. 2017 May 4;169(4):736–749.e18. doi: 10.1016/j.cell.2017.04.016 (PMC5422211; doi:10.1016/j.cell.2017.04.016), 2017-05-04
Supplement: mmc4.pdf [file mmc4.pdf]

**Table S4 : Main Features of the M-5, M-11 and M-13 and Previous Association of These Markers with Cancer Outcome, Related with Figure 4**

|                        | <b>CD163</b>                                                                                 | <b>CD169</b>                                                                                                                         | <b>CD206</b>                                                                                                                             | <b>CD204</b>                                                                                                                               | <b>CD38</b>                                     | <b>CD81</b>                                     | <b>PD-L1/CD274*</b>                                                                                                                        |
|------------------------|----------------------------------------------------------------------------------------------|--------------------------------------------------------------------------------------------------------------------------------------|------------------------------------------------------------------------------------------------------------------------------------------|--------------------------------------------------------------------------------------------------------------------------------------------|-------------------------------------------------|-------------------------------------------------|--------------------------------------------------------------------------------------------------------------------------------------------|
| <b>M-5</b>             | -                                                                                            | - / +                                                                                                                                | -                                                                                                                                        | +                                                                                                                                          | ++                                              | +                                               | +                                                                                                                                          |
| <b>M-11</b>            | +                                                                                            | +                                                                                                                                    | +                                                                                                                                        | +                                                                                                                                          | +                                               | +                                               |                                                                                                                                            |
| <b>M-13</b>            | - / +                                                                                        | -                                                                                                                                    | -                                                                                                                                        | +                                                                                                                                          | +                                               | +                                               |                                                                                                                                            |
| <b>Reported effect</b> | Pro-tumor macrophage associated with poor outcome                                            | Anti-tumor immunity, CD169+ sinus macrophages in lymph node are associated with good prognosis                                       | Pro-tumor macrophages, associated with poor outcome                                                                                      | Pro-tumor macrophage associated with poor outcome                                                                                          | Involved in immunosuppressive function of MDSCs | Involved in immunosuppressive function of MDSCs | Involved in T cell immunosuppression and showed predictive value for immunotherapy                                                         |
| <b>cancer type</b>     | Lung cancer, T cell leukemia, Hodgkin lymphoma,                                              | Colorectal cancer, endometrial carcinoma, metastatic melanoma                                                                        | Renal cell carcinoma, prostate adenocarcinoma, glioma, Hepatocellular carcinoma                                                          | Glioma, ovarian cancer, lung cancer, pancreatic cancer, esophageal cancer, upper urinary tract carcinoma and EBV associated gastric cancer | Murine model of esophageal cancer               | Tumor mouse model                               | Poor prognosis in breast cancer, clear cell renal cell carcinoma, good prognosis in high grade serous ovarian cancer                       |
| <b>References</b>      | Yang Li et al, Oncotarget, 2015; Komohara et al, Cancer Sci, 2013; Tan K et al, Blood, 2012; | Asano et al, Immunity, 2011; Ohnishi et al, Cancer Science 2013; Saito Y et al, Cancer Immunol Res, 2015; Ohnishi K Cancer Sci, 2016 | Xu L et al, Urol Oncol, 2014; Hu W et al, Oncol Lett, 2015; Ding P et al, Cell Biochem Biophys, 2014; Dong P et al, Int J Mol Sci, 2016; | Ohtaki Y et al, J Thorac Oncol, 2010; Hirayama S, J Thorac Oncol, 2012; Ichimura T et al, Hum Pathol, 2016                                 | Karakasheva T et al, Cancer Res, 2015           | Vences-Catalán F et al, Cancer Res, 2015        | Leite KR et al, Diagn Pathol 2015; Okabe M et al, Cancer Sci, 2017; Webb JR, Gynecol Oncol, 2016; Xiangjiao M et al, Canc Treat Rev, 2015) |

\*assessed only on the surface of M5
