# Supplementary material for: An Immune Atlas of Clear Cell Renal Cell Carcinoma
Source: PubMed Central journal article supplement — Cell. 2017 May 4;169(4):736–749.e18. doi: 10.1016/j.cell.2017.04.016 (PMC5422211; doi:10.1016/j.cell.2017.04.016), 2017-05-04
Supplement: mmc5.pdf [file mmc5.pdf]

**Table S5 : Top 20 Relationships between Cell Clusters Ranked by Significance, Related to Figure 6**

| Rank | Cell Type 1 | Cell Type 2 | Pearson Coefficient | P-value     |
|------|-------------|-------------|---------------------|-------------|
| 1    | T-13        | T-16        | 0.69049069          | 9.97926E-12 |
| 2    | M-5         | T-0         | 0.64552295          | 5.32231E-10 |
| 3    | T-1         | T-8         | 0.62949441          | 1.88259E-09 |
| 4    | T-10        | T-4         | -0.604078479        | 1.21069E-08 |
| 5    | T-3         | T-4         | 0.538607445         | 7.41785E-07 |
| 6    | T-3         | T-0         | -0.517311498        | 2.36532E-06 |
| 7    | T-15        | T-11        | 0.501862794         | 5.22928E-06 |
| 8    | T-6         | T-0         | 0.499703567         | 5.8247E-06  |
| 9    | T-10        | T-5         | 0.447262428         | 6.46564E-05 |
| 10   | NK          | T-11        | 0.444013589         | 7.41176E-05 |
| 11   | M-10        | T-1         | -0.418885601        | 0.000203683 |
| 12   | T-6         | T-11        | -0.417175905        | 0.000217569 |
| 13   | M-5         | T-1         | 0.410334491         | 0.000282289 |
| 14   | T-2         | T-12        | 0.406744295         | 0.000322913 |
| 15   | T-4         | T-8         | -0.401806993        | 0.000387547 |
| 16   | T-17        | T-19        | 0.394258949         | 0.000509473 |
| 17   | T-10        | T-0         | 0.38754674          | 0.00064629  |
| 18   | M-16        | NK          | 0.385832939         | 0.00068621  |
| 19   | M-5         | T-12        | -0.376182165        | 0.000955962 |
| 20   | M-12        | T-17        | 0.375626039         | 0.000974103 |
