# Supplementary material for: An Immune Atlas of Clear Cell Renal Cell Carcinoma
Source: PubMed Central journal article supplement — Cell. 2017 May 4;169(4):736–749.e18. doi: 10.1016/j.cell.2017.04.016 (PMC5422211; doi:10.1016/j.cell.2017.04.016), 2017-05-04
Supplement: mmc7.pdf [file mmc7.pdf]

**Table S7 : List of Antibodies used for Multiplexed Imaging, Related to Figure 6**

| <b>Antigen</b>             | <b>Host</b> | <b>Specificity</b> | <b>Clone</b> | <b>Conjugate</b> | <b>Company</b>         |
|----------------------------|-------------|--------------------|--------------|------------------|------------------------|
| CD38                       | rabbit      | human              | EPR4106      | Purified         | Abcam                  |
| CD68                       | mouse       | human              | KP1          | Purified         | eBioscience            |
| CD8                        | mouse       | human              | 4B11         | Purified         | Bio-Rad                |
| IgG1, 2a, 3 (Fc fragment)  | Goat        | Mouse              |              | HRP              | Jackson ImmunoResearch |
| IgG (H+L)                  | Donkey      | Goat               |              | HRP              | SantaCruz              |
| IgG (minimal x-reactivity) | Donkey      | Rabbit             |              | HRP              | Biolegend              |
